# Supplementary material for: The Prevalence, Risk Factors, and Outcomes of Hepatitis E Virus Infection in Solid Organ Transplant Recipients in a Highly Endemic Area of Italy
Source: MDPI journal article supplement (doi:10.3390/v17040502), 2025-03-31
Supplement: s1 [file viruses-3531041-supplementary.pdf › viruses-3531041-supplementary.pdf]

**Supplementary Table S1.** Distribution of the different HEV markers in SOT recipients.

| Recipient | Anti-IgM     | Anti-IgM        | Anti-IgG      | Anti-IgG        | HEV RNA                              |
|-----------|--------------|-----------------|---------------|-----------------|--------------------------------------|
| IN        | OD           | qr              | OD            | qr              | copies/ml                            |
| 18        | 0.000        | Negative        | <b>0.311*</b> | <b>Positive</b> | NR                                   |
| 25        | 0.000        | Negative        | <b>0.923</b>  | <b>Positive</b> | NR                                   |
| 34        | 0.001        | Negative        | <b>2.101</b>  | <b>Positive</b> | NR                                   |
| 36        | <b>1.202</b> | <b>Positive</b> | <b>1.940</b>  | <b>Positive</b> | NR                                   |
| 39        | 0.001        | Negative        | <b>1.600</b>  | <b>Positive</b> | NR                                   |
| 43        | 0.000        | Negative        | <b>0.541</b>  | <b>Positive</b> | NR                                   |
| 44        | 0.001        | Negative        | <b>2.516</b>  | <b>Positive</b> | NR                                   |
| 45        | 0.000        | Negative        | <b>0.950</b>  | <b>Positive</b> | NR                                   |
| 46        | 0.001        | Negative        | <b>0.471</b>  | <b>Positive</b> | NR                                   |
| 52        | 0.039        | Negative        | <b>1.404</b>  | <b>Positive</b> | NR                                   |
| 54        | 0.029        | Negative        | <b>2.530</b>  | <b>Positive</b> | NR                                   |
| 55        | 0.000        | Negative        | <b>0.275</b>  | <b>Positive</b> | NR                                   |
| 57        | 0.000        | Negative        | <b>2.458</b>  | <b>Positive</b> | NR                                   |
| 58        | 0.001        | Negative        | 0.008         | <b>Negative</b> | <b>10<sup>4</sup>-10<sup>5</sup></b> |
| 59        | 0.002        | Negative        | <b>1.768</b>  | <b>Positive</b> | NR                                   |
| 72        | 0.031        | Negative        | <b>1.818</b>  | <b>Positive</b> | NR                                   |
| 73        | 0.027        | Negative        | <b>2.455</b>  | <b>Positive</b> | NR                                   |
| 74        | 0.001        | Negative        | <b>0.713</b>  | <b>Positive</b> | NR                                   |
| 82        | 0.103        | Negative        | <b>2.497</b>  | <b>Positive</b> | NR                                   |
| 84        | <b>2.312</b> | <b>Positive</b> | <b>3.000</b>  | <b>Positive</b> | <b>&gt;10<sup>5</sup></b>            |
| 87        | 0.002        | Negative        | <b>0.322</b>  | <b>Positive</b> | NR                                   |
| 92        | <b>0.523</b> | <b>Positive</b> | <b>2.479</b>  | <b>Positive</b> | NR                                   |
| 97        | 0.173        | Negative        | <b>2.541</b>  | <b>Positive</b> | NR                                   |
| 99        | 0.000        | Negative        | <b>2.493</b>  | <b>Positive</b> | NR                                   |
| 107       | 0.000        | Negative        | <b>1.268</b>  | <b>Positive</b> | NR                                   |
| 108       | 0.088        | Negative        | <b>0.607</b>  | <b>Positive</b> | NR                                   |
| 119       | <b>2.550</b> | <b>Positive</b> | <b>2.545</b>  | <b>Positive</b> | <b>10<sup>5</sup></b>                |
| 126       | 0.000        | Negative        | <b>0.683</b>  | <b>Positive</b> | NR                                   |
| 132       | 0.001        | Negative        | <b>0.679</b>  | <b>Positive</b> | NR                                   |
| 133       | <b>1.270</b> | <b>Positive</b> | 0.001         | <b>Negative</b> | <b>&lt; 10<sup>2</sup></b>           |
| 138       | 0.001        | Negative        | <b>1.202</b>  | <b>Positive</b> | NR                                   |
| 141       | <b>0.538</b> | <b>Positive</b> | <b>1.526</b>  | <b>Positive</b> | NR                                   |
| 145       | 0.001        | Negative        | <b>2.500</b>  | <b>Positive</b> | NR                                   |
| 158       | 0.016        | Negative        | <b>1.763</b>  | <b>Positive</b> | NR                                   |
| 160       | 0.001        | Negative        | <b>0.210</b>  | <b>Positive</b> | NR                                   |
| 161       | 0.012        | Negative        | <b>0.671</b>  | <b>Positive</b> | NR                                   |
| 166       | 0.000        | Negative        | <b>0.243</b>  | <b>Positive</b> | NR                                   |
| 174       | 0.139        | Negative        | <b>2.493</b>  | <b>Positive</b> | NR                                   |
| 175       | 0.001        | Negative        | <b>2.246</b>  | <b>Positive</b> | NR                                   |
| 197       | 0.070        | Negative        | <b>0.285</b>  | <b>Positive</b> | NR                                   |
| 199       | 0.000        | Negative        | <b>2.494</b>  | <b>Positive</b> | NR                                   |
| 200       | 0.000        | Negative        | <b>2.533</b>  | <b>Positive</b> | NR                                   |
| 204       | 0.000        | Negative        | <b>2.467</b>  | <b>Positive</b> | NR                                   |
| 205       | 0.000        | Negative        | <b>1.088</b>  | <b>Positive</b> | NR                                   |
| 213       | 0.003        | Negative        | <b>1.970</b>  | <b>Positive</b> | NR                                   |
| 215       | 0.002        | Negative        | <b>1.266</b>  | <b>Positive</b> | NR                                   |

|     |              |                 |              |                 |                       |
|-----|--------------|-----------------|--------------|-----------------|-----------------------|
| 218 | <b>0.350</b> | <b>Positive</b> | <b>1.746</b> | <b>Positive</b> | NR                    |
| 223 | 0.004        | Negative        | <b>0.378</b> | <b>Positive</b> | NR                    |
| 226 | 0.001        | Negative        | <b>0.589</b> | <b>Positive</b> | NR                    |
| 228 | <b>2.535</b> | <b>Positive</b> | <b>1.190</b> | <b>Positive</b> | <b>10<sup>3</sup></b> |
| 234 | 0.012        | Negative        | <b>1.279</b> | <b>Positive</b> | NR                    |
| 236 | 0.000        | Negative        | <b>2.475</b> | <b>Positive</b> | NR                    |
| 237 | 0.002        | Negative        | <b>2.532</b> | <b>Positive</b> | NR                    |
| 242 | 0.001        | Negative        | <b>2.490</b> | <b>Positive</b> | NR                    |
| 252 | 0.001        | Negative        | <b>2.448</b> | <b>Positive</b> | NR                    |
| 262 | 0.001        | Negative        | <b>0.824</b> | <b>Positive</b> | NR                    |
| 265 | 0.013        | Negative        | <b>0.638</b> | <b>Positive</b> | NR                    |
| 267 | 0.001        | Negative        | <b>2.557</b> | <b>Positive</b> | NR                    |
| 272 | 0.000        | Negative        | <b>2.491</b> | <b>Positive</b> | NR                    |
| 275 | 0.000        | Negative        | <b>0.929</b> | <b>Positive</b> | NR                    |
| 287 | <b>0.834</b> | Negative        | <b>2.361</b> | <b>Positive</b> | NR                    |
| 292 | 0.001        | Negative        | <b>1.510</b> | <b>Positive</b> | NR                    |
| 294 | 0.001        | Negative        | <b>0.958</b> | <b>Positive</b> | NR                    |

IN, Identification Number; OD, Optical Density; qr, qualitative result; NR, non-reactive.

\* Positive test results are highlighted in bold
